# Supplementary material for: Characterization of a Novel Phenol Hydroxylase in Indoles Biotranformation from a Strain Arthrobacter sp. W1
Source: PLOS journal article supplement (doi:10.1371/journal.pone.0044313), 2012-09-13
Supplement: S4 (10.1371/journal.pone.0044313.s004) [file journal.pone.0044313.s004]

**A.**

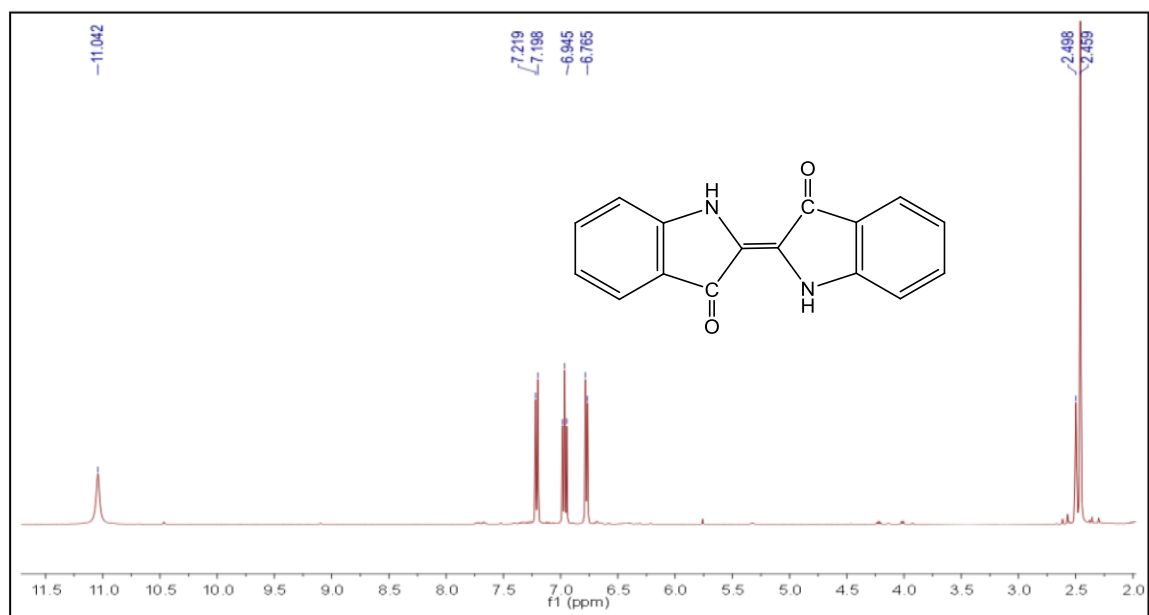

**B.**

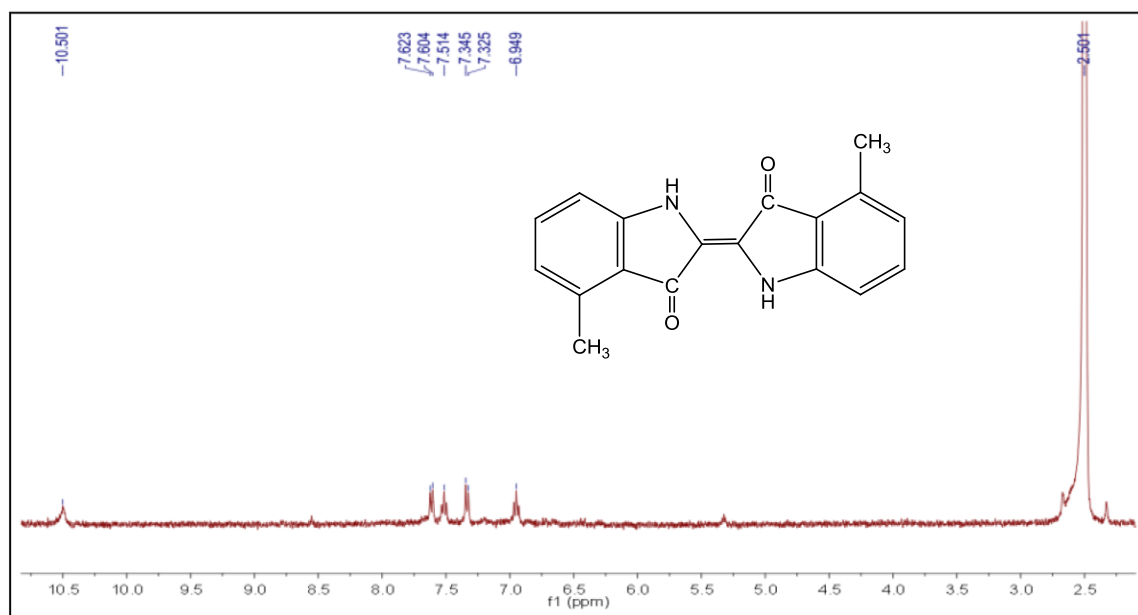

C.

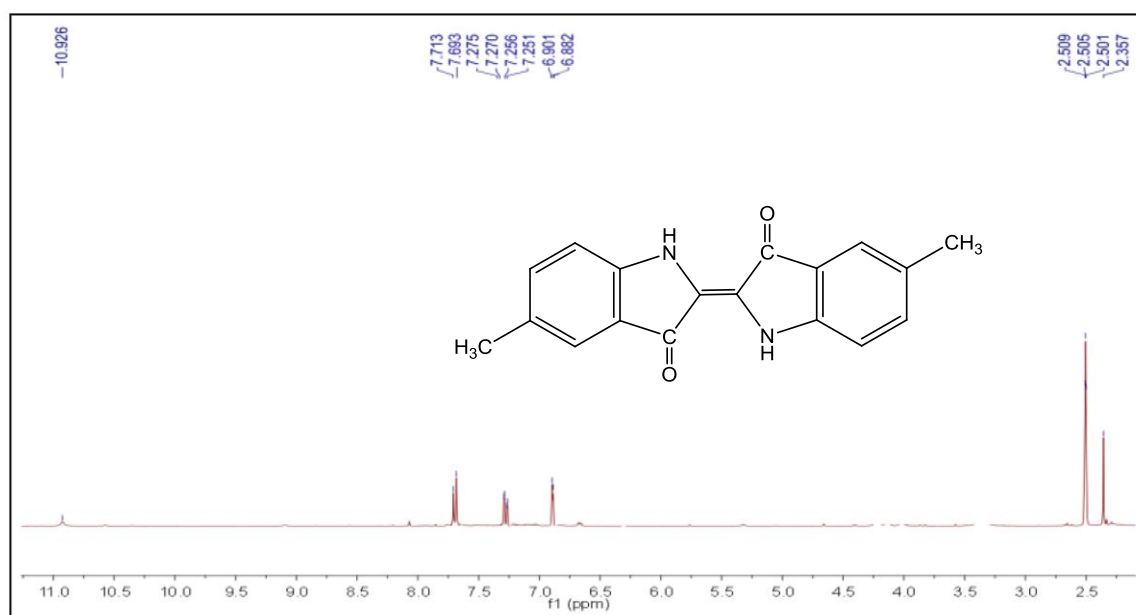

D.

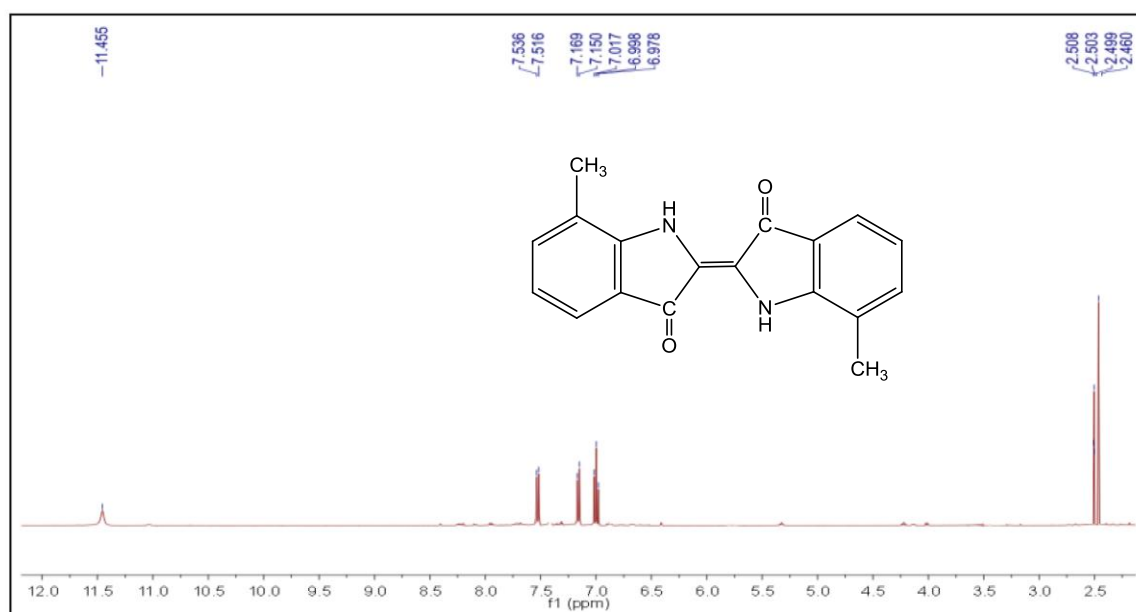

**E.**

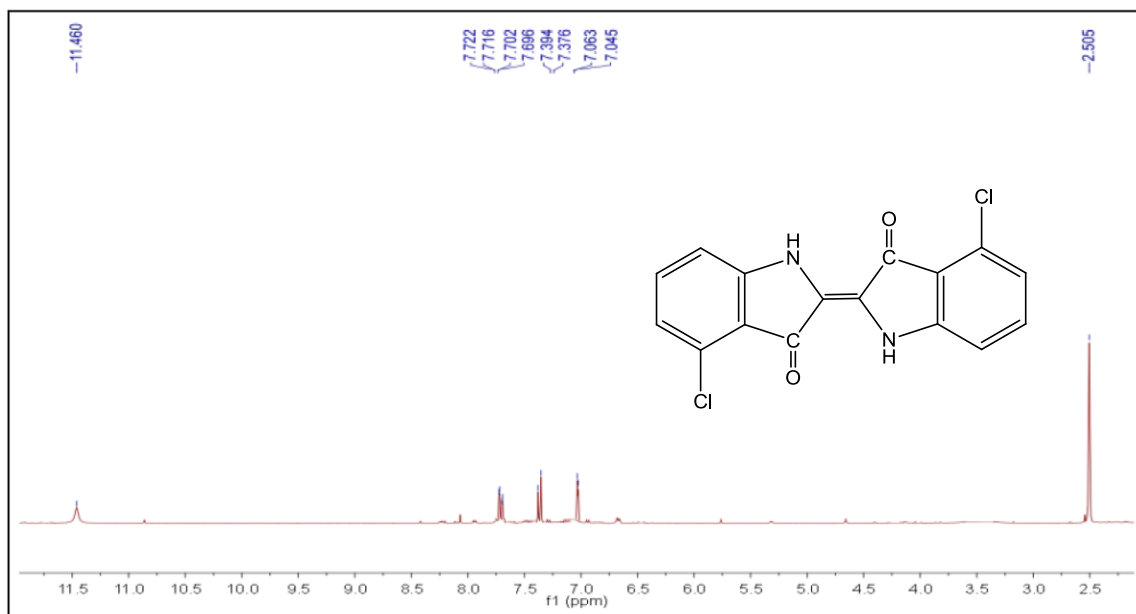

**F.**

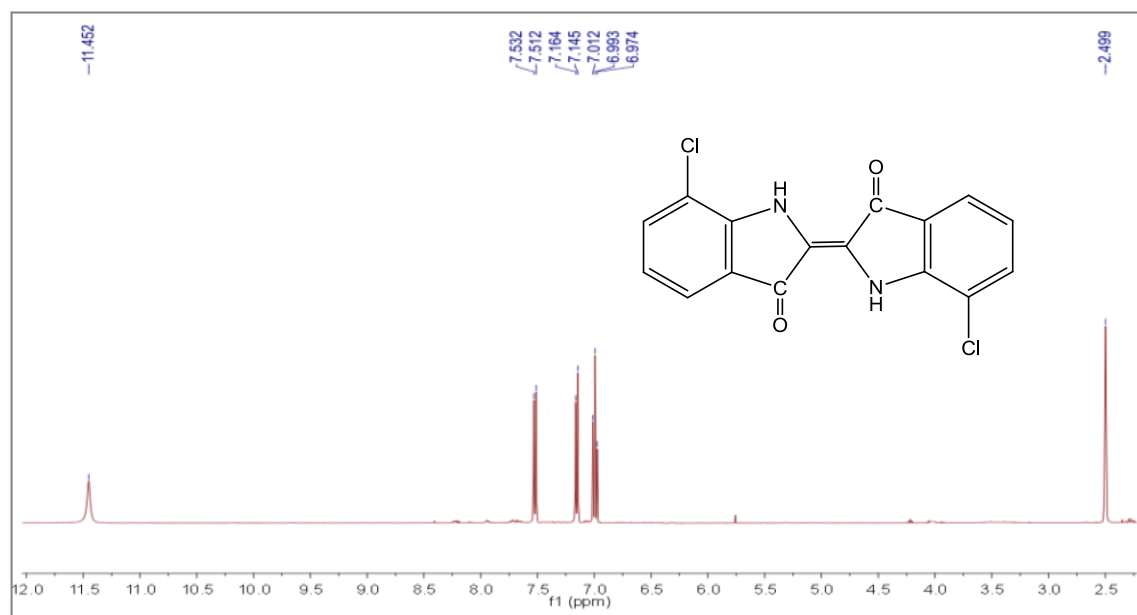

**G.**

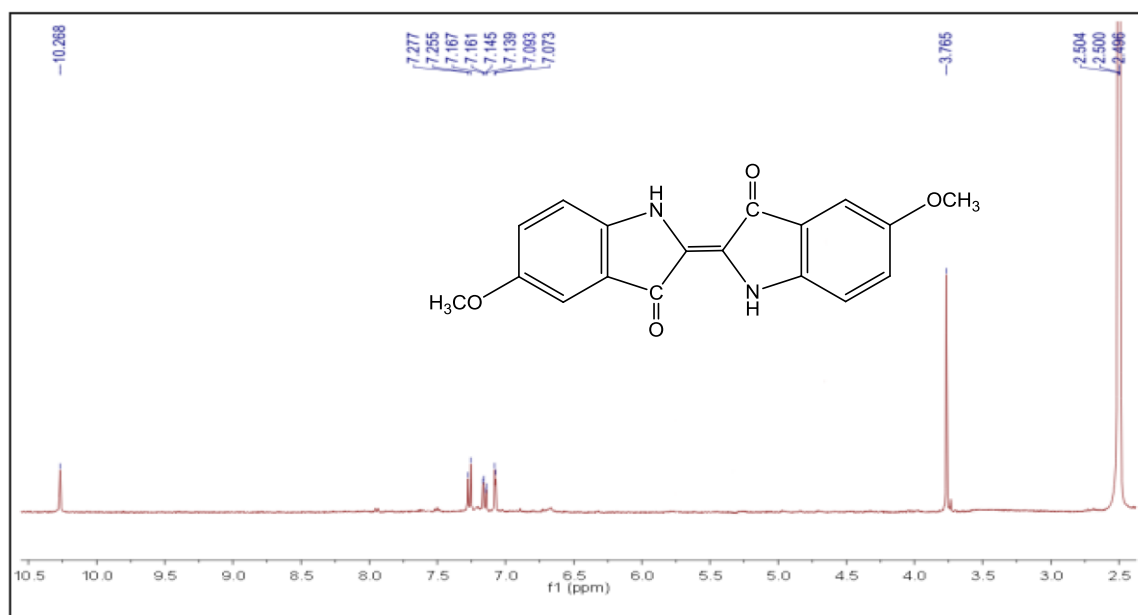

**Figure S4. <sup>1</sup>H NMR spectra of purified indigoid products formed from indoles by strain PH<sub>IND</sub>.** **A.** Products of indole transformation; **B.** Products of 4-methylindole transformation; **C.** Products of 5-methylindole transformation; **D.** Products of 7-methylindole transformation; **E.** Products of 4-chloroindole transformation; **F.** Products of 7-chloroindole transformation; **G.** Products of 5-methoxyindole transformation. <sup>1</sup>H NMR was carried out at 298 K with Bruker Avance II 400M and 400 MHz instrument and the samples were dissolved in *d*<sub>6</sub> Me<sub>2</sub>SO.
